# Supplementary material for: 3D Bioprinting of Biomimetic Bilayered Scaffold Consisting of Decellularized Extracellular Matrix and Silk Fibroin for Osteochondral Repair
Source: PubMed Central journal article supplement — Int J Bioprint. 2021 Sep 14;7(4):401. doi: 10.18063/ijb.v7i4.401 (PMC8611412; doi:10.18063/ijb.v7i4.401), 2021-09-14
Supplement: IJB-7-4-401-s0001.pdf [file IJB-7-4-401-s0001.pdf]

## Supplementary file

**Table S1.** Primer sequences

| <b>Genes</b>  | <b>Forward primer (5'–3')</b> | <b>Reverse primer (5'–3')</b> |
|---------------|-------------------------------|-------------------------------|
| <i>COL II</i> | F- CGCCACGGTCCTACAATGTC       | R- GTCACCTCTGGGTCCTTGTTAC     |
| <i>COL I</i>  | F- GACATGTTTCAGCTTTGTGGACCTC  | R- GGGACCCTTAGGCCATTGTGTA     |
| <i>SOX-9</i>  | F- GACGTGCAAGCTGGGAAAGT       | R- CGGCAGGTATTGGTCAAATC       |
| <i>ACAN</i>   | F- CCCAACCAGCCTGACAACCT       | R- CCTTCTCGTGCCAGATCATCA      |
| <i>OCN</i>    | F-GAGGGCAATAAGGTAGTGAA        | R- CATAGATGCGTTTGTAGGC        |
| <i>RUNX2</i>  | F- TTCAACGATCTGAGATTTGTGGG    | R- GGATGAGGAATGCGCCCTA        |
| <i>ALP</i>    | F- GAGCGTCATCCCAGTGGAG        | R- TAGCGGTTACTGTAGACACCC      |

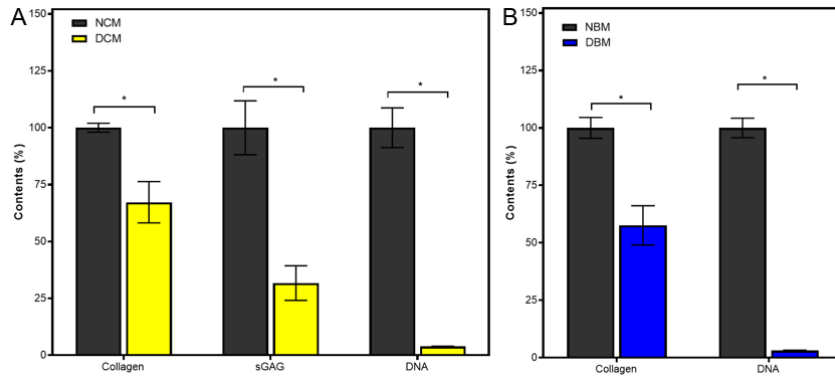

**Figure S1.** The collagen and glycosaminoglycans (GAGs) contents in (A) cartilage extracellular matrix and (B) bone extracellular matrix before and after decellularization (n = 3; \*P < 0.05).

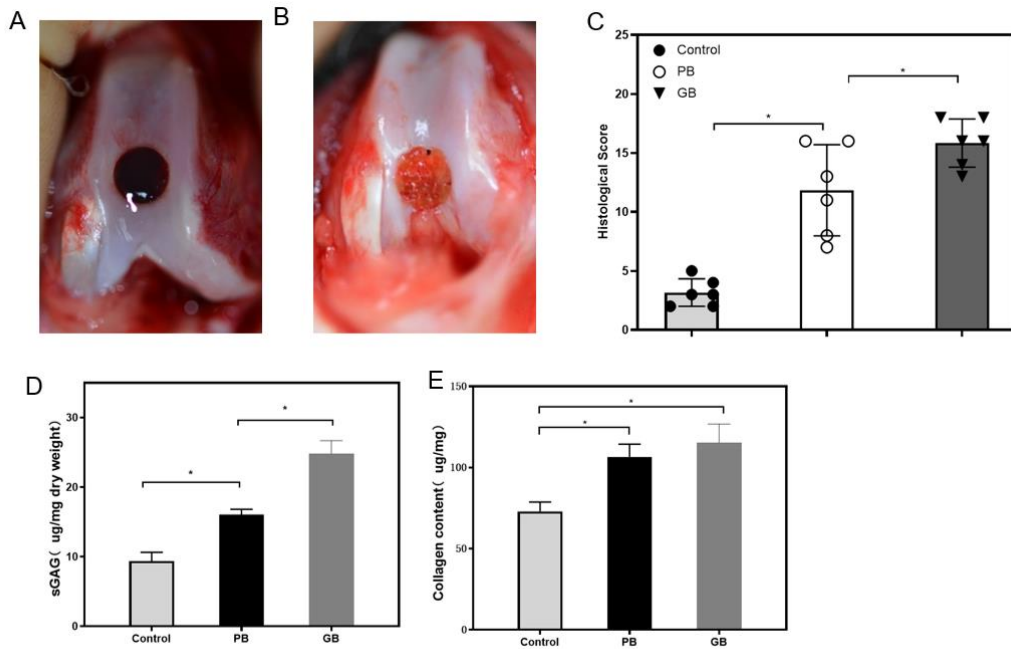

**Figure S2.** (A) Osteochondral defects (diameter: 4 mm, depth: 5 mm) on the patellar groove of right knee joints in rabbit model. (B) Bilayered constructs containing TGF- $\beta$ 1 and BMP-2 were implanted in the osteochondral defect. (C) Histological score for repaired cartilage after 3 months of in vivo implantation. Biochemical quantification showing (D) dry weight normalized sGAG content and (E) dry weight normalized collagen content (n = 6; \*P < 0.05).
